# Supplementary material
Source: publisher figshare collection journal article supplement (https://tandf.figshare.com/ndownloader/files/14530754)
Supplement: Supplementary file 1 [file 14530754]

## Sheet: Sheet1
Supplement Table 1 The expression of 8 proteins in OSCC tissues with or without lymph node metastasis
Name		H-score of tissues with or without lymph node metastasis
			without		with		P value
SOD			113.00 ± 4.54		128.10 ± 4.12		0.0205
BST2			100.90 ± 5.81		116.9 0± 3.45		0.033
CAD			53.63 ± 6.93		90.56 ± 9.27		0.0019
ITGB6			98.76 ± 5.82		126.10 ± 3.58		0.0005
PRDX4			73.15 ± 8.04		105.10 ± 7.07		0.0057
P4HA2			106.30 ± 5.20		111.50 ± 6.23		0.5212
TGM2			50.06 ± 8.21		58.29 ± 8.60		0.4973
THBS1			69.98 ± 5.55		74.36 ± 8.21		0.6489

## Sheet: Sheet2
Supplement Table 1 The expression of 8 proteins in OSCC tissues with or without lymph node metastasis
Name		H-score of tissues with or without lymph node metastasis
			without		with		P value
SOD2			113.00 ± 4.54		128.10 ± 4.12		0.0205
BST2			100.90 ± 5.81		116.9 0± 3.45		0.033
CAD			53.63 ± 6.93		90.56 ± 9.27		0.0019
ITGB6			98.76 ± 5.82		126.10 ± 3.58		0.0005
PRDX4			73.15 ± 8.04		105.10 ± 7.07		0.0057
P4HA2			106.30 ± 5.20		111.50 ± 6.23		0.5212
TGM2			50.06 ± 8.21		58.29 ± 8.60		0.4973
THBS1			69.98 ± 5.55		74.36 ± 8.21		0.6489
